# Supplementary material
Source: MDPI journal article supplement (https://www.mdpi.com/2073-4395/12/6/1401)
Supplement: s1 [file s1]

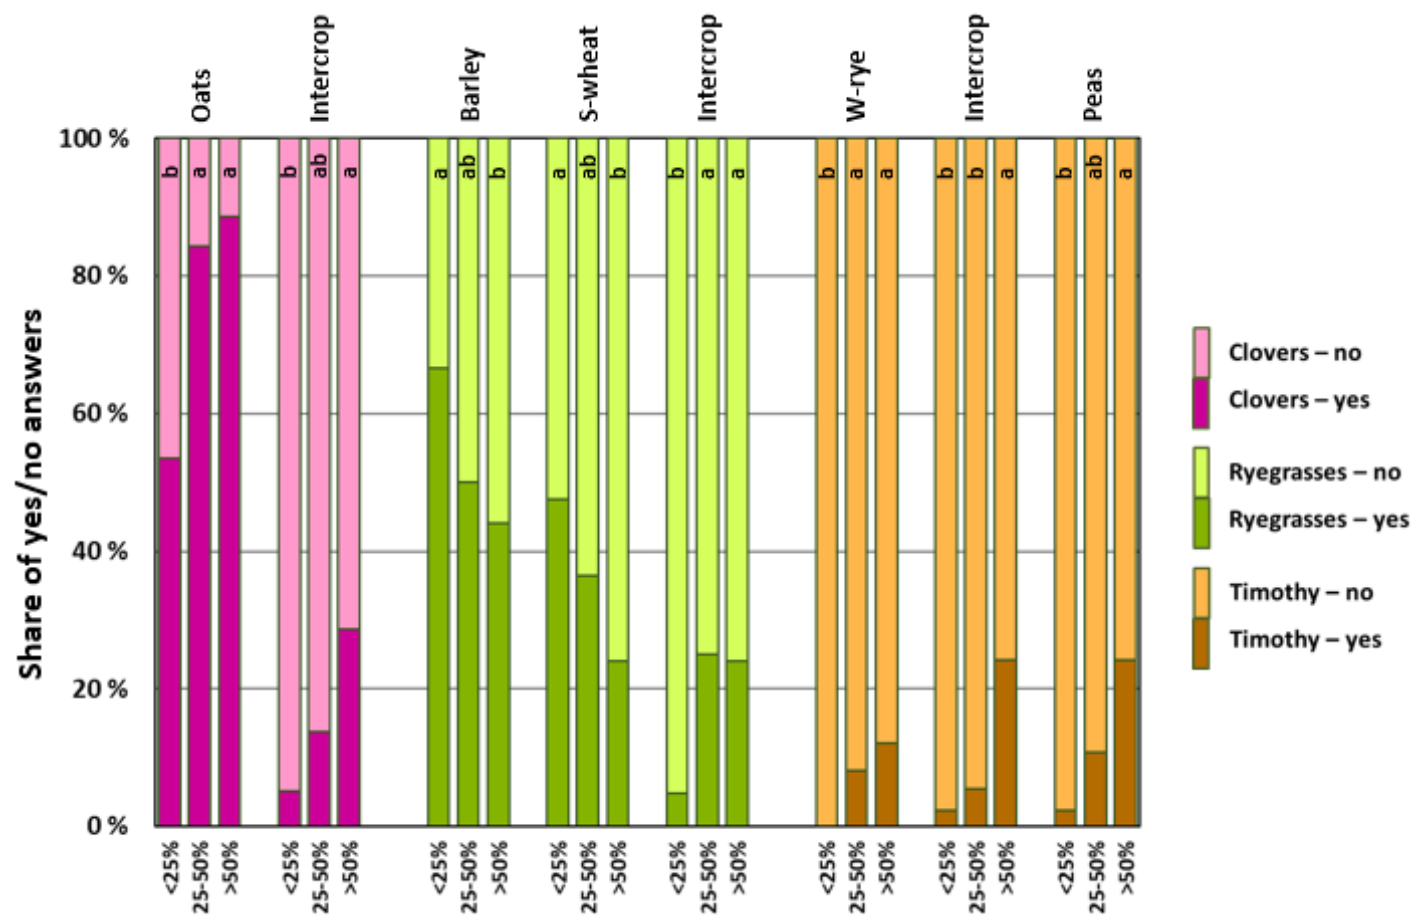

**Figure S1.** Impact of share of grassland area on a farm on cash crop and under-sown cover crop (CC) -group combinations in Finland. Only significant differences with a p-value  $\leq 0.05$  are shown. Means with the same letter for each grassland area group and CC cash crop combination do not differ significantly.

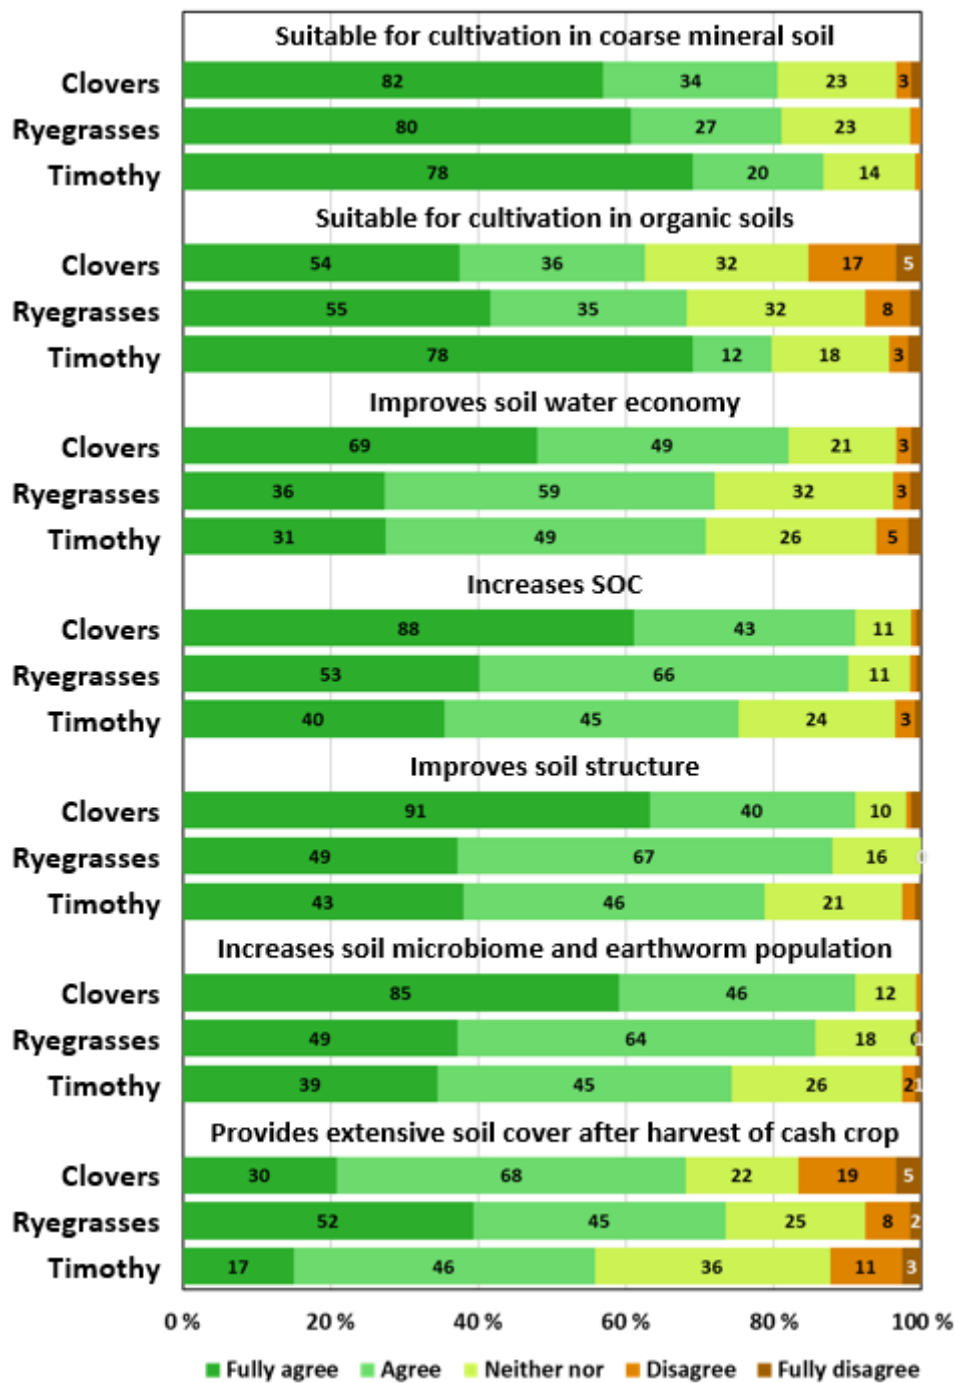

**Figure S2.** The shares of the farmers' answers (1 = fully disagree, 2 = disagree, 3 = neither agree nor disagree, 4 = agree, and 5 = fully agree) to seven statements (only those with significant difference between CC-groups) about the suitability of CC-groups for different soil types, their impacts on soil health, and their capacity to provide extensive soil cover. The number of answers for each answer choice is shown except in the case of being <3. For clovers n = 144, ryegrasses n = 132 and timothy n = 113.

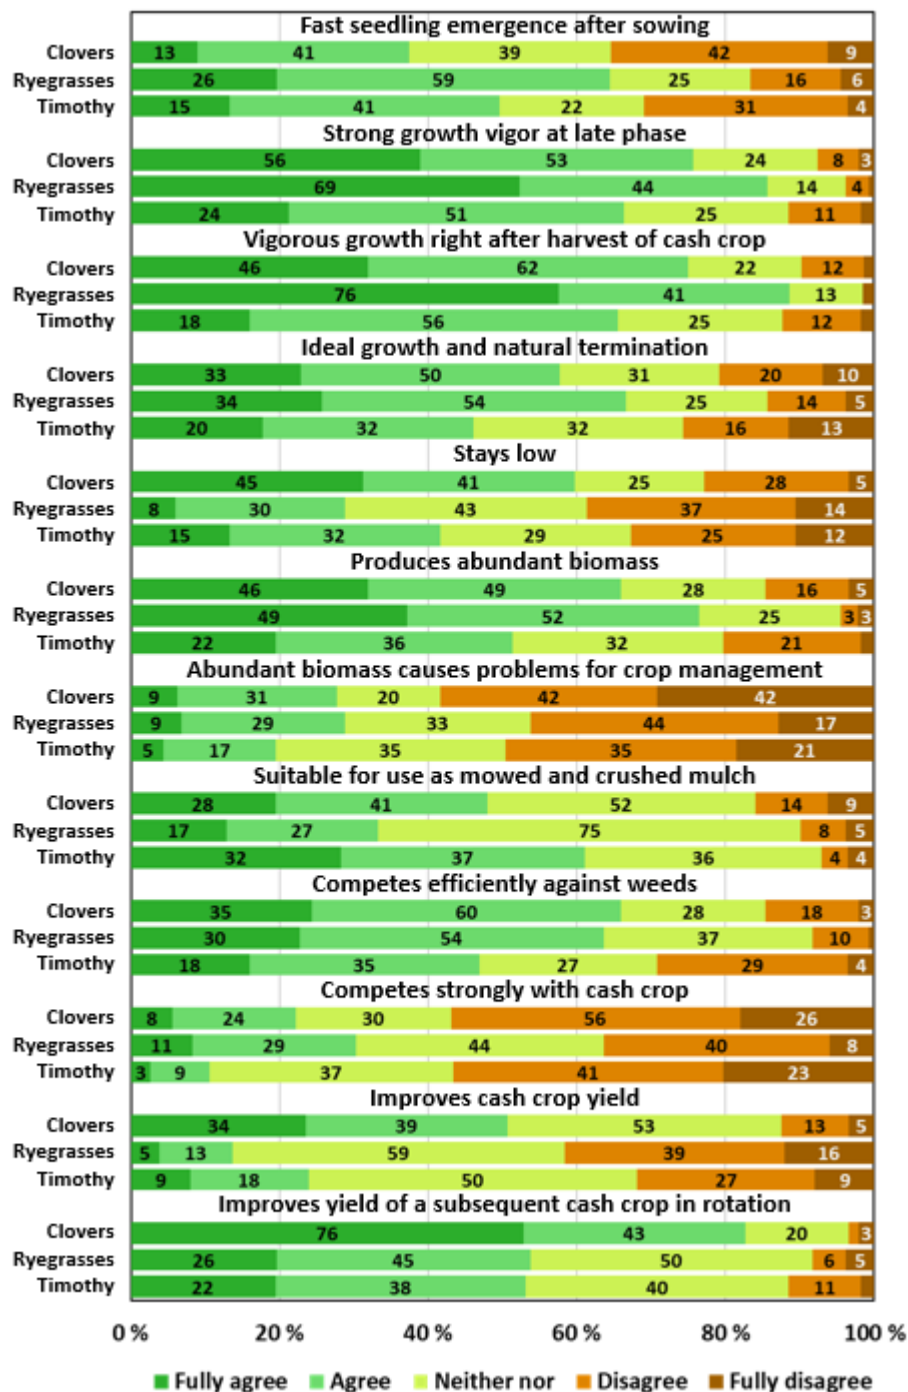

**Figure S3.** The shares of the farmers' answers (1 = fully disagree, 2 = disagree, 3 = neither agree nor disagree, 4 = agree, and 5 = fully agree) to 12 statements (only those with significant difference between CC-groups) on the growth performance of CC groups, their biomass production, competition, and impacts on cash crop yields. The number of answers for each answer choice is shown except in the case of being <3. For clovers n = 144, ryegrasses n = 132 and timothy n = 113.
